# Supplementary material
Source: PubMed Central journal article supplement (PMC3918757)
Supplement: 1323618111_pnas.201323618SI.pdf [file 1323618111_pnas.201323618SI.pdf]

# Supporting Information

St. John et al. 10.1073/pnas.1323618111

SI Text

$$\begin{aligned}\frac{d p}{d t} &= \frac{-p \cdot v d p}{k d p + p} + \frac{v t p}{k n p + (C 1 n + C 2 n)^3} \\ \frac{d c 1}{d t} &= \frac{-c 1 \cdot v d c 1}{c 1 + k d c 1} + \frac{v t c 1}{k n c 1 + (C 1 n + C 2 n)^3} \\ \frac{d c 2}{d t} &= \frac{-c 2 \cdot v d c 2}{c 2 + k d c 1} + \frac{v t c 2}{k n c 1 + (C 1 n + C 2 n)^3} \\ \frac{d P}{d t} &= -C 1 \cdot P \cdot v a C 1 P + C 1 n \cdot v d C 1 P - C 2 \cdot P \cdot v a C 1 P + C 2 n \cdot v d C 1 P - \frac{P \cdot v d P}{P + k d P} + k t x n p \cdot p \\ \frac{d C 1}{d t} &= -C 1 \cdot P \cdot v a C 1 P - \frac{C 1 \cdot v d C 1}{C 1 + k d C 1} + C 1 n \cdot v d C 1 P + c 1 \\ \frac{d C 2}{d t} &= -C 2 \cdot P \cdot v a C 1 P - \frac{C 2 \cdot v d C 2}{C 2 + k d C 1} + C 2 n \cdot v d C 1 P + c 2 \\ \frac{d C 1 n}{d t} &= C 1 \cdot P \cdot v a C 1 P - C 1 n \cdot v d C 1 P - \frac{C 1 n \cdot v d C n}{C 1 n + C 2 n + k d C n} \\ \frac{d C 2 n}{d t} &= C 2 \cdot P \cdot v a C 1 P - \frac{C 2 n \cdot M C 2 n \cdot v d C n}{C 1 n + C 2 n + k d C n} - C 2 n \cdot v d C 1 P\end{aligned}$$

**Model 1.** Hirota et al. 2012 (1).

1. Hirota T, et al. (2012) Identification of small molecule activators of cryptochrome. *Science* 337(6098):1094–1097.

$$\frac{d \text{CLKBM1}}{dt} = \text{BM1n} \cdot \text{kfCLKBM1} - \text{CLKBM1} \cdot \text{dCLKBM1} - \text{CLKBM1} \cdot \text{kdCLKBM1}$$

$$\frac{d \text{reverb}}{dt} = \frac{V3 \max \left( g \cdot \frac{\text{CLKBM1}^v}{kt^3} + 1 \right)}{\frac{\text{CLKBM1}^v}{kt^3} \cdot \left( \frac{\text{PnCn} + \text{PnPcN}}{ki^3} \right)^w + \frac{\text{CLKBM1}^v}{kt^3} + 1} - \text{dreverb} \cdot \text{reverb}$$

$$\frac{d \text{ror}}{dt} = \frac{V4 \max \left( h \cdot \frac{\text{CLKBM1}^p}{kt^4} + 1 \right)}{\frac{\text{CLKBM1}^p}{kt^4} \cdot \left( \frac{\text{PnCn} + \text{PnPcN}}{ki^4} \right)^q + \frac{\text{CLKBM1}^p}{kt^4} + 1} - \text{dror} \cdot \text{ror}$$

$$\frac{d \text{REVERBc}}{dt} = -\text{REVERBc} \cdot \text{dREVERBc} - \text{REVERBc} \cdot \text{kiREVERBc} + \text{kp3} \cdot \text{reverb}$$

$$\frac{d \text{RORc}}{dt} = -\text{RORc} \cdot \text{dRORc} - \text{RORc} \cdot \text{kiRORc} + \text{kp4} \cdot \text{ror}$$

$$\frac{d \text{REVERBn}}{dt} = \text{REVERBc} \cdot \text{kiREVERBc} - \text{REVERBn} \cdot \text{dREVERBn}$$

$$\frac{d \text{RORn}}{dt} = \text{RORc} \cdot \text{kiRORc} - \text{RORn} \cdot \text{dRORn}$$

$$\frac{d \text{bm1}}{dt} = \frac{V5 \max \left( i \cdot \frac{\text{RORn}^n}{kt^5} + 1 \right)}{\frac{\text{REVERBn}^m}{kt^5} + \frac{\text{RORn}^n}{kt^5} + 1} - \text{bm1} \cdot \text{dbm1}$$

$$\frac{d \text{BM1c}}{dt} = -\text{BM1c} \cdot \text{dBM1c} - \text{BM1c} \cdot \text{kiBM1c} + \text{bm1} \cdot \text{kp5}$$

$$\frac{d \text{BM1n}}{dt} = \text{BM1c} \cdot \text{kiBM1c} - \text{BM1n} \cdot \text{dBM1n} - \text{BM1n} \cdot \text{kfCLKBM1} + \text{CLKBM1} \cdot \text{kdCLKBM1}$$

$$\frac{d \text{per}}{dt} = \frac{V1 \max \left( a \cdot \frac{\text{CLKBM1}^b}{kt^1} + 1 \right)}{\frac{\text{CLKBM1}^b}{kt^1} \cdot \left( \frac{\text{PnCn} + \text{PnPcN}}{ki^1} \right)^c + \frac{\text{CLKBM1}^b}{kt^1} + 1} - \text{dper} \cdot \text{per}$$

$$\frac{d \text{cry}}{dt} = \frac{V2 \max \left( \frac{\text{CLKBM1}^3 \cdot d}{kt^2} + 1 \right)}{\left( \frac{\text{REVERBn}^f}{kt^2} + 1 \right) \left( \frac{\text{CLKBM1}^3}{kt^2} + \frac{\text{CLKBM1}^e}{kt^2} \left( \frac{\text{PnCn} + \text{PnPcN}}{ki^2} \right)^f + 1 \right)} - \text{cry} \cdot \text{dcry}$$

$$\frac{d \text{Cc}}{dt} = -\text{Cc} \cdot \text{Pc} \cdot \text{kfPcCc} - \text{Cc} \cdot \text{Pcp} \cdot \text{kfPcpCc} - \text{Cc} \cdot \text{dCc} + \text{PcCc} \cdot \text{kdPcCc} + \text{PcpCc} \cdot \text{kdPcpCc} + \text{cry} \cdot \text{kp2}$$

$$\frac{d \text{Pc}}{dt} = -\text{Cc} \cdot \text{Pc} \cdot \text{kfPcCc} - \text{Pc} \cdot \text{dPc} - \text{Pc} \cdot \text{kphPc} + \text{PcCc} \cdot \text{kdPcCc} + \text{Pcp} \cdot \text{kdphPcp} + \text{kp1} \cdot \text{per}$$

$$\frac{d \text{Pcp}}{dt} = -\text{Cc} \cdot \text{Pcp} \cdot \text{kfPcpCc} + \text{Pc} \cdot \text{kphPc} - \text{Pcp} \cdot \text{dPcp} - \text{Pcp} \cdot \text{kdphPcp} + \text{PcpCc} \cdot \text{kdPcpCc}$$

$$\frac{d \text{PcpCc}}{dt} = \text{Cc} \cdot \text{Pcp} \cdot \text{kfPcpCc} - \text{PcpCc} \cdot \text{dPcpCc} - \text{PcpCc} \cdot \text{kdPcpCc} - \text{PcpCc} \cdot \text{kiPcpCc} + \text{PnPcN} \cdot \text{kePnPcN}$$

$$\frac{d \text{PcCc}}{dt} = \text{Cc} \cdot \text{Pc} \cdot \text{kfPcCc} - \text{PcCc} \cdot \text{dPcCc} - \text{PcCc} \cdot \text{kdPcCc} - \text{PcCc} \cdot \text{kiPcCc} + \text{PnCn} \cdot \text{kePnPcN}$$

$$\frac{d \text{PnPcN}}{dt} = \text{PcpCc} \cdot \text{kiPcpCc} - \text{PnPcN} \cdot \text{dPnPcN} - \text{PnPcN} \cdot \text{kePnPcN}$$

$$\frac{d \text{PnCn}}{dt} = \text{PcCc} \cdot \text{kiPcCc} - \text{PnCn} \cdot \text{dPnCn} - \text{PnCn} \cdot \text{kePnPcN}$$

## Model 2. Relógio et al. 2011 (1).

1. Relógio A, et al. (2011) Tuning the mammalian circadian clock: Robust synergy of two loops. *PLOS Comput Biol* 7(12):e1002309.



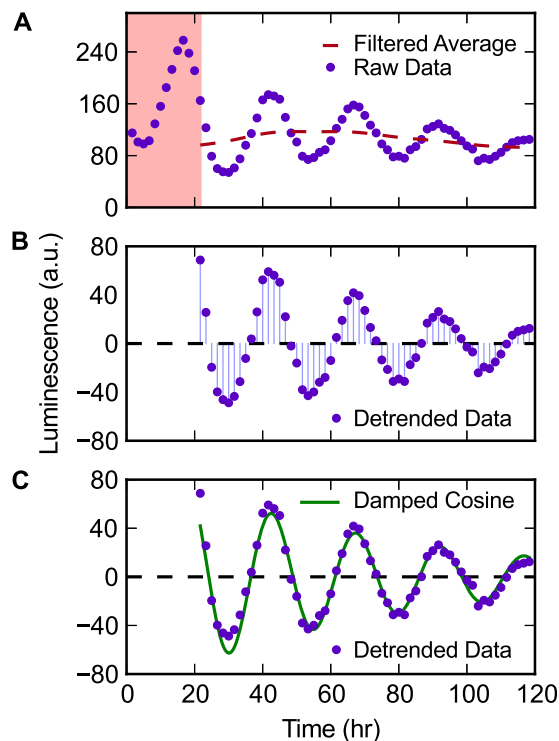

**Fig. S1.** Analysis of circadian reporter luminescence data. (A) Raw luminescence data are first cropped by removing the initial transient region (first 12 points). The moving baseline is estimated using a Hodrick–Prescott filter with smoothing parameter 1,600 (red dashed line). (B) Data are detrended by subtracting the moving baseline from the raw data. The detrended data are used to calculate the relative amplitude of the oscillations via SD. (C) Periods are estimated by fitting a damped cosine curve (green solid line) to the detrended data.

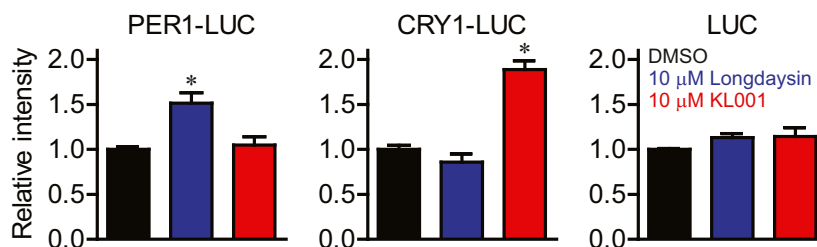

**Fig. S2.** Effects of longdaysin and KL001 on period 1 (PER1)-luciferase (LUC) and cryptochrome 1 (CRY1)-LUC abundance. HEK293 stable cell lines expressing PER1-LUC, CRY1-LUC, or LUC from a constitutive promoter were treated with DMSO, 10  $\mu$ M longdaysin, or 10  $\mu$ M KL001 for 24 h, and luminescence was measured. The luminescence intensity relative to DMSO control is shown as mean  $\pm$  SEM ( $n = 4$ –8). \* $P < 0.001$  compared with DMSO (one-way ANOVA with Dunnett's post hoc test).

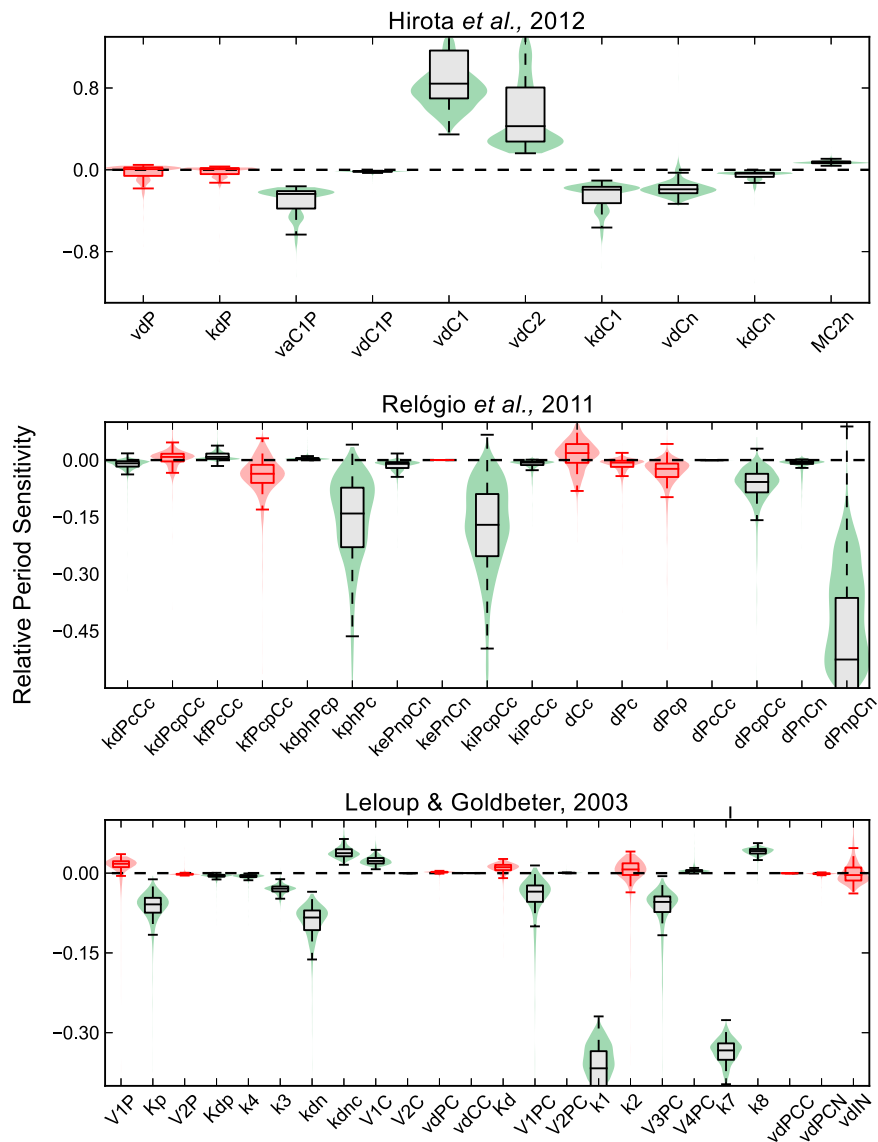

**Fig. S3.** Bootstrap confidence intervals in relative period sensitivities. Violin plots for distributions in relative period sensitivities for parameters associated with PER and CRY proteins. Whiskers extend to the most extreme data point within 1.5x the inner quartile range. Distributions in which the 5th and 95th percentile lie on opposite sides of the x axis are colored red and deemed nonidentifiable.
